# Supplementary material
Source: PubMed Central journal article supplement (PMC4079745)
Supplement: NIHMS589573-supplement-Supp_FigureS1-S2.pdf [file NIHMS589573-supplement-Supp_FigureS1-S2.pdf]

**A**

*S. meliloti*  
field isolates | *Mx*  
DK1622

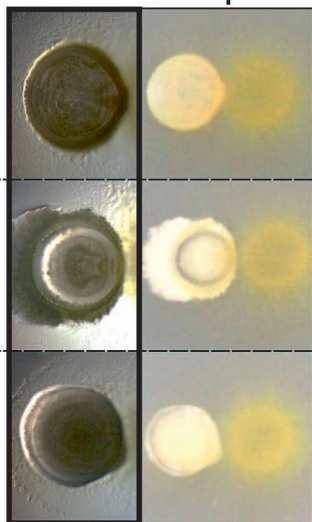

*S. meliloti*  
laboratory strains | *Mx*  
DK1622

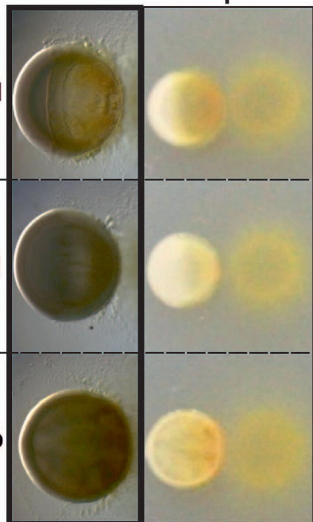**B**

*S. meliloti*  
field isolates | *Mx* DZ2

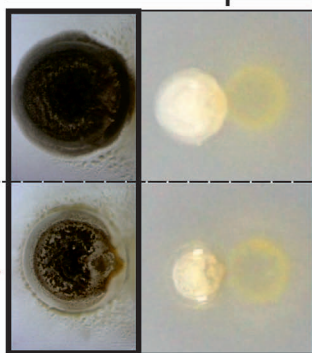

*S. meliloti*  
laboratory strains | *Mx* DZ2

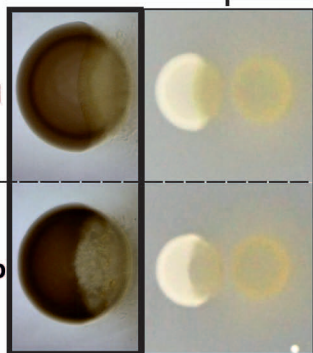

**A**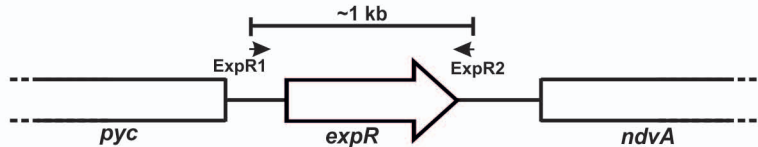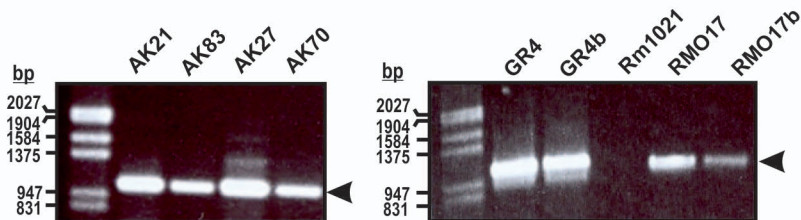**B**

|               |                                                                      |     |
|---------------|----------------------------------------------------------------------|-----|
| RMO17         | MNITLLVQFLALLEEMKTREEILPEFERLLDRCGFDFYGVIRQPKPHENPLRLLLAGRWP         | 60  |
| AK21/83/27/70 | MNITLLVQFLALLEEMKTREEILPEFERLLDRCGFDFYGVIRQPKPHENPLRLLLAGRWP         | 60  |
| GR4           | MNITLLVQFLALLEEMKTREEILPEFERLLDRCGFDFYGVIRQPKPHENPLRLLLAGRWP         | 60  |
| RMO17b        | MNITLLVQFLALLEEMKTREEILPEFERLLDRCGFDFYGVIRQPKPHENPLRLLLAGRWP         | 60  |
| Rm1021        | MNITLLVQFLALLEEMKTREEILPEFERLLDRCGFDFYGVIRQPKPHENPLRLLLAGRWP         | 60  |
| GR4b          | MNITLLVQFLALLEEMKTREEILPEFERLLDRCGFDFYGVIRQPKPHENPLRLLLAG <b>GLA</b> | 60  |
|               |                                                                      |     |
| RMO17         | EGWPQIYIRKKYVVIDPTIRFLGHAQRGFRWRD TLVAFRSDPHRKRMSMMVEARNHGFLF        | 120 |
| AK21/83/27/70 | EGWPQIYIRKKYVVIDPTIRFLGHAQRGFRWRD TLVAFRSDPHRKRMSMMVEARNHGFLF        | 120 |
| GR4           | EGWPQIYIRKKYVVIDPTIRFLGHAQRGFRWRD TLVAFRSDPHRKRMSMMVEARNHGFLF        | 120 |
| RMO17b        | EGWPQIYIRKKYVVIDPTIRFLGHAQRGFRWRD TLVAFRSDPHRKRMSMMVEARNHGFLF        | 120 |
| Rm1021        | EGWPQIYIR----- <b>ELAPERP</b> -----                                  | 76  |
| GR4b          | <b>ANLHPQEIRRYRS--DHSLPRACPARLPLARHARGIPLGPAPQAHGKHDGR-GAQSWPLR</b>  | 117 |
|               |                                                                      |     |
| RMO17         | DGYIF-PVHGRRGLMGNLTVGGRVVDLSPVELSLFDAIAKRLFWKLELTDPEIMAEELVS         | 179 |
| AK21/83/27/70 | DGYIF-PVHGRRGLMGNLTVGGRVVDLSPVELSLFDAIAKRLFWKLELTDPEIMAEELVS         | 179 |
| GR4           | DGYIF-PVHGRRGLMGNLTVGGRVVDLSPVELSLFDAIAKRLFWKLELTDPEIMAEELVS         | 179 |
| RMO17b        | DGYIF-PVHGRRGLMGNLTVGGRVVDLSPVELSLFDAIAKRLFWKLELTDPEIMAEELVS         | 179 |
| Rm1021        | ----- <b>GHAPPLS</b> -----                                           | 83  |
| GR4b          | <b>RLYLSGPRPARAHGQPDRRRPGSRSEPGVEPFRRHCAQAVLEAARTHRS GDHGGTCLPR</b>  | 177 |
|               |                                                                      |     |
| RMO17         | RVEVQMTREMEALHYLDGMTSNDIG-KVLDISSHTVDWYMNIGIQEKLKAKNRHHVVAI          | 238 |
| AK21/83/27/70 | RVEVQMTREMEALHYLDGMTSNDIG-KVLDISSHTVDWYMNIGIQEKLKAKNRHHVVAI          | 238 |
| GR4           | RVEVQMTREMEALHYLDGMTSNDIG-KVLDISSHTVDWYMNIGIQEKLKAKNRHHVVAI          | 238 |
| RMO17b        | RVEVQMTREMEALHYLDGMTLN <b>D</b> IG-KVLDISSHTVDWYMNIGIQEKLKAKNRHHVVAI | 238 |
| Rm1021        | -----                                                                | 238 |
| GR4b          | <b>RS PDDAARNGGAPLSRRRNDLERHRQGPRHFQPHGRLVHERHPGKVEGEEPPSRRGD-RL</b> | 236 |
|               |                                                                      |     |
| RMO17         | AFRLGLIS                                                             | 246 |
| AK21/83/27/70 | AFRLGLIS                                                             | 246 |
| GR4           | AFRLGLIS                                                             | 246 |
| RMO17b        | AFRLGLIS                                                             | 246 |
| Rm1021        | -----                                                                | 246 |
| GR4b          | <b>PPGTDLL-</b>                                                      | 243 |
